# Supplementary material for: A Novel Trimethoprim Resistance Gene, dfrA35, Characterized from Escherichia coli from Calves
Source: PubMed Central journal article supplement (PMC6506621; doi:10.1128/msphere.00255-19), 2019-05-08
Supplement: mSphere.00255-19-st001.pdf [file mSphere.00255-19-st001.pdf]

**Supplementary Table S1.** List of sequenced bacteria containing *dfrA35* found in the NCBI GenBank database (accessed 30 November 2018).

| Species                    | Strain                     | Origin          | Country        | Length in<br>aa | Identity in % |     |              | NCBI Acc. No.              | size of overlapping region<br>(identity) | ISCR2- <i>dfrA35-sul2</i> |
|----------------------------|----------------------------|-----------------|----------------|-----------------|---------------|-----|--------------|----------------------------|------------------------------------------|---------------------------|
|                            |                            |                 |                |                 | aa            | nt  |              |                            |                                          |                           |
| <i>E. coli</i>             | 2013C-4491                 | human           | unknown        | 170             | 100           | 100 | CP027355     | 48.7 kb (99%) complete     | ISCR2- <i>dfrA35-sul2</i>                |                           |
| <i>E. coli</i>             | RiKo 2308/09 RIKO2308_155c | unknown         | unknown        | 170             | 100           | 100 | LCVI01000155 | 48.7 kb (99%) complete     | ISCR2- <i>dfrA35-sul2</i>                |                           |
| <i>E. coli</i>             | 364072-17                  | unknown         | Switzerland    | 170             | 100           | 100 | PYRP01000006 | 24.3 kb (99%)              | 'ISCR2- <i>dfrA35-NSA</i>                |                           |
| <i>E. coli</i>             | 364062-17                  | unknown         | Switzerland    | 170             | 100           | 100 | PYSC01000001 | 24.3 kb (99%)              | 'ISCR2- <i>dfrA35-NSA</i>                |                           |
| <i>E. coli</i>             | 364068-17                  | unknown         | Switzerland    | 170             | 100           | 100 | PYRX01000002 | 24.2 kb (99%)              | 'ISCR2- <i>dfrA35-sul2</i>               |                           |
| <i>E. coli</i>             | ecoli006                   | human           | unknown        | 170             | 100           | 100 | UWV101000001 | 23.8 kb (99%)              | ISCR2- <i>dfrA35-sul2</i>                |                           |
| <i>E. coli</i>             | NT2                        | cattle          | Czech Republic | 170             | 100           | 100 | QYZN01000009 | 23.8 kb (99%)              | ISCR2- <i>dfrA35-sul2</i>                |                           |
| <i>E. coli</i>             | 22593                      | cattle          | France         | 170             | 100           | 100 | LMBK01000112 | 21 kb (99%)                | 'ISCR2- <i>dfrA35-sul2</i>               |                           |
| <i>E. coli</i>             | MS 124-1                   | human           | unknown        | 170             | 100           | 100 | ADWT01000099 | 6 kb (100%)                | NSA- <i>dfrA35-sul2</i>                  |                           |
| <i>E. coli</i>             | G76                        | mastitis/cattle | Germany        | 170             | 100           | 100 | LOPR01000045 | 5.8 kb (100%)/1.2 kb (84%) | NSA- <i>dfrA35-sul2</i>                  |                           |
| <i>E. coli</i>             | RiKo 2305/09 RIKO2305_49c  | unknown         | unknown        | 170             | 100           | 100 | JYPB01000049 | 5.8 kb (99%)               | NSA- <i>dfrA35-sul2</i>                  |                           |
| <i>E. coli</i>             | GER_MD02_1511_Eco_064      | fecal/dog       | Germany        | 170             | 100           | 100 | PURJ01000057 | 5.8 kb (100%)              | NSA- <i>dfrA35-sul2</i>                  |                           |
| <i>E. coli</i>             | GER_MD06_1511_Eco_062      | fecal/dog       | Germany        | 170             | 100           | 100 | PURL01000057 | 5.8 kb (100%)              | NSA- <i>dfrA35-sul2</i>                  |                           |
| <i>E. coli</i>             | MS 84-1                    | human           | unknown        | 170             | 100           | 100 | ADTK01000026 | 5.5 kb (99%)               | NSA- <i>dfrA35-sul2</i>                  |                           |
| <i>Acinetobacter sp</i>    | ANC 5318                   | nose/horse      | Czech Republic | 170             | 100           | 100 | PGPB01000023 | 3 kb (100%)/1kb (100%)     | 'ISCR2- <i>dfrA35-NSA</i>                |                           |
| <i>E. coli</i>             | MS 85-1                    | human           | unknown        | 170             | 100           | 100 | ADWQ01000115 | 2.3 kb (99%)               | NSA- <i>dfrA35-sul2'</i>                 |                           |
| <i>E. coli</i>             | 364073-17                  | unknown         | Switzerland    | 170             | 100           | 100 | PYRU01000163 | 2.3 kb (100%)              | NSA- <i>dfrA35-sul2'</i>                 |                           |
| <i>E. coli</i>             | GER_MD08_1505_Eco_019      | fecal/dog       | Germany        | 170             | 100           | 100 | PUSY01000104 | 2.3 kb (100%)              | NSA- <i>dfrA35-sul2'</i>                 |                           |
| <i>E. coli</i>             | GER_MD08_1505_Eco_035      | fecal/dog       | Germany        | 170             | 100           | 100 | PUSL01000111 | 2.2 kb (100%)              | NSA- <i>dfrA35-sul2'</i>                 |                           |
| <i>E. coli</i>             | RiKo 2340/09 RIKO2340_126c | unknown         | unknown        | 170             | 100           | 100 | LAGW01000126 | 2.1 kb (100%)              | NSA- <i>dfrA35-sul2'</i>                 |                           |
| <i>E. coli</i>             | G213                       | mastitis/cattle | Israel         | 170             | 100           | 100 | LOOH01000094 | 2.1 kb (100%)              | NSA- <i>dfrA35-sul2'</i>                 |                           |
| <i>E. coli</i>             | STEC 514-2 514-2           | calf            | Israel         | 170             | 100           | 100 | MRVZ01000194 | 1.8 kb (100%)              | NSA- <i>dfrA35-NSA</i>                   |                           |
| <i>E. coli</i>             | 364064-17                  | unknown         | Switzerland    | 170             | 100           | 100 | PYSA01000272 | 1.8 kb (100%)              | NSA- <i>dfrA35-NSA</i>                   |                           |
| <i>E. coli</i>             | STEC 573-4 573-4           | cow             | Israel         | 170             | 100           | 100 | MRWA01000125 | 1.7 kb (100%)              | NSA- <i>dfrA35-NSA</i>                   |                           |
| <i>E. coli</i>             | 31_Esco_HA-NL 130741A      | human           | Netherlands    | 170             | 100           | 100 | NXOD01000140 | 1.6 kb (100%)              | NSA- <i>dfrA35-NSA</i>                   |                           |
| <i>E. coli</i>             | RefSeq.                    | hospital        | unknown        | 170             | 100           | 100 | WP_024198497 | no DNA sequence            | no DNA sequence                          |                           |
| <i>Gammaproteobacteria</i> | RefSeq.                    | unknown         | unknown        | 170             | 100           | 100 | WP_000949574 | no DNA sequence            | no DNA sequence                          |                           |

' : truncated

NSA: No sequence available due to termination of the contig
